# Supplementary material for: Modulation of prostate cancer genetic risk by omega-3 and omega-6 fatty acids
Source: JCI journal article supplement (doi:10.1172/jci31494), 2007-06-22
Supplement: sd1 [file 1]

sTable I. Diet Ingredients

| Ingredient                    | Diet Group (g/100 g Dry Weight) |                 |                  |
|-------------------------------|---------------------------------|-----------------|------------------|
|                               | High $\omega$ -3                | Low $\omega$ -3 | High $\omega$ -6 |
| <b>Variable diet fat</b>      |                                 |                 |                  |
| Palm oil                      | 8                               | 10              | 6.5              |
| Olive oil                     | 3                               | 0               | 0                |
| Safflower oil                 | 0                               | 3               | 6.5              |
| EPA <sup>1</sup>              | 1                               | 0               | 0                |
| DHA <sup>1</sup>              | 1                               | 0               | 0                |
| <b>Fixed diet ingredients</b> |                                 |                 |                  |
| Wheat F1                      | 30.0                            |                 |                  |
| Sucrose                       | 10.0                            |                 |                  |
| Dextrin                       | 10.0                            |                 |                  |
| Casein                        | 10.0                            |                 |                  |
| Lactalbumin                   | 10.0                            |                 |                  |
| Alphacel                      | 11.0                            |                 |                  |
| $\beta$ -Sitosterol           | 0.015                           |                 |                  |
| Vitamin mix <sup>2</sup>      | 1.0                             |                 |                  |
| Mineral mix <sup>3</sup>      | 4.7                             |                 |                  |
| Choline bitartrate            | 0.25                            |                 |                  |
| $\alpha$ -tocopherol          | 0.002                           |                 |                  |
| $\gamma$ -tocopherol          | 0.002                           |                 |                  |
| Tenox 20A                     | 0.002                           |                 |                  |

1. Incromege EPA; 500TG (50% EPA and 10% DHA) and Incromege DHA; 500TG (10% EPA and 50% DHA) from Bioriginal ([www.bioriginal.com](http://www.bioriginal.com)) were used. TG: triglyceride form.

2. AIN-93M; TD94049.

3. AIN-93; TD 94047.

Note: Diets contain 397 Kcal/100g and 30% of energy is from fat, 50% from carbohydrates, and 20% from proteins.

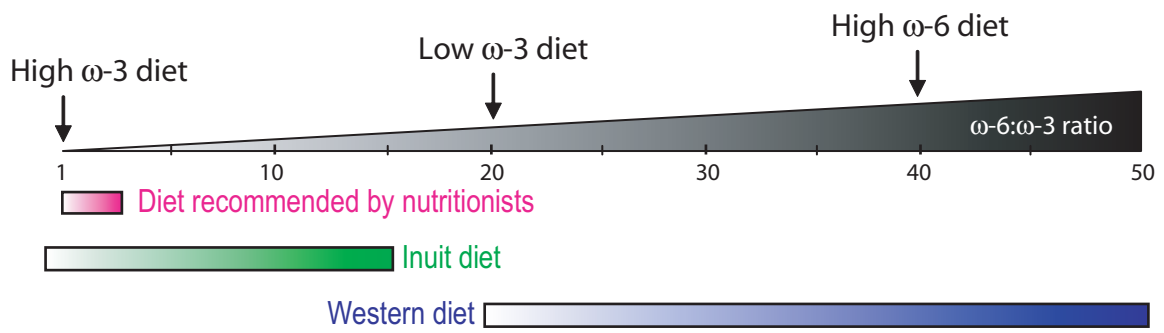

sFigure 1

**A**

Percent distribution of total fatty acids

| FA \ Diet       | High $\omega$ -3 | Low $\omega$ -3 | High $\omega$ -6 |
|-----------------|------------------|-----------------|------------------|
| 14:0            | 0.44             | 0.36            | 0.30             |
| 14:1            | 0.00             | 0.00            | 0.00             |
| 16:0            | 22.74            | 19.60           | 19.72            |
| 16:1            | 0.93             | 1.76            | 0.86             |
| 18:0            | 8.74             | 8.07            | 10.03            |
| 18:1(Total)     | 13.38            | 15.66           | 8.87             |
| 18:1(vaccenate) | 0.89             | 1.75            | 1.02             |
| 18:1(oleate)    | 12.49            | 13.91           | 7.85             |
| 18:2            | 12.33            | 15.23           | 24.01            |
| 18:3            | 0.00             | 0.00            | 0.00             |
| 20:0            | 0.27             | 0.14            | 0.18             |
| 20:1            | 0.98             | 0.46            | 0.51             |
| 20:2            | 0.19             | 1.28            | 0.94             |
| 20:3            | 0.00             | 0.00            | 0.00             |
| 20:4            | 7.72             | 20.27           | 24.44            |
| 20:5            | 10.06            | 0.09            | 0.04             |
| 22:0            | 0.00             | 0.03            | 0.04             |
| 22:6            | 8.84             | 1.39            | 1.18             |

**B**

$\omega$ -6 to  $\omega$ -3 PUFA ratios

|          | High $\omega$ -3 diet |             |                          | Low $\omega$ -3 diet |             |                          | High $\omega$ -6 diet |             |                          |
|----------|-----------------------|-------------|--------------------------|----------------------|-------------|--------------------------|-----------------------|-------------|--------------------------|
|          | $\omega$ -3           | $\omega$ -6 | $\omega$ -6: $\omega$ -3 | $\omega$ -3          | $\omega$ -6 | $\omega$ -6: $\omega$ -3 | $\omega$ -3           | $\omega$ -6 | $\omega$ -6: $\omega$ -3 |
| Food     | 9.9                   | 9.8         | 1.0                      | 0.5                  | 10.5        | 21.0                     | 0.5                   | 21.7        | 43.4                     |
| Blood    | 18.9                  | 20.0        | 1.1                      | 1.5                  | 35.5        | 23.7                     | 1.2                   | 48.5        | 40.4                     |
| Prostate | 9.1                   | 8.3         | 0.9                      | 0.7                  | 12.9        | 18.4                     | 0.4                   | 21.3        | 48.4                     |

**C**

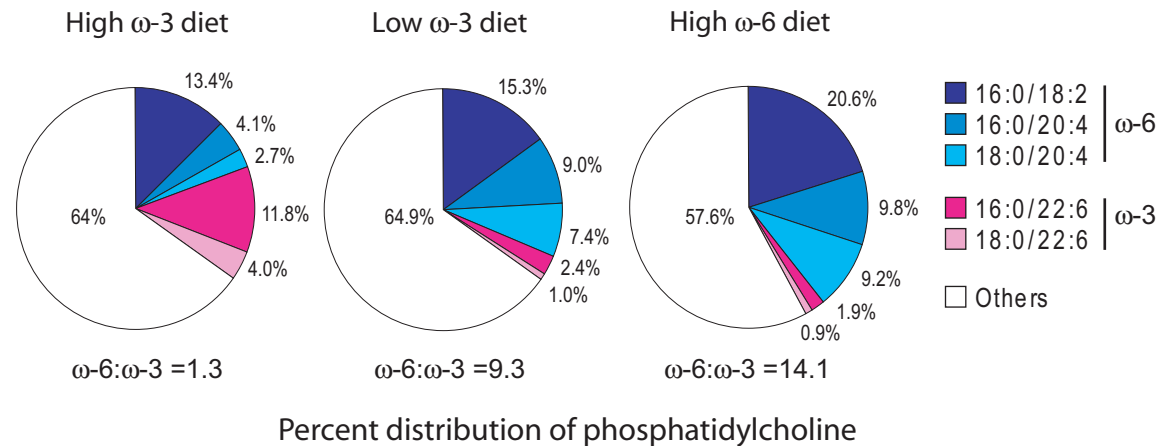

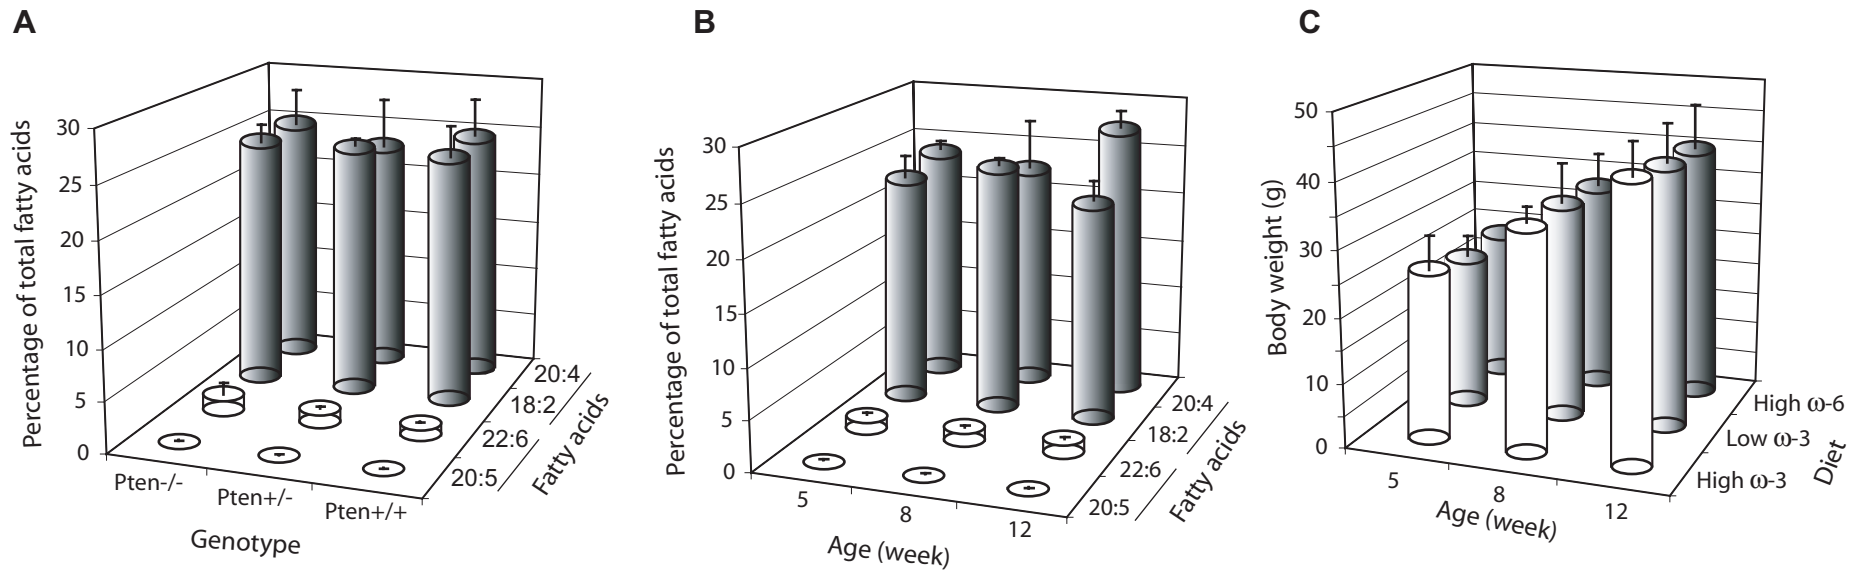

sFigure 3

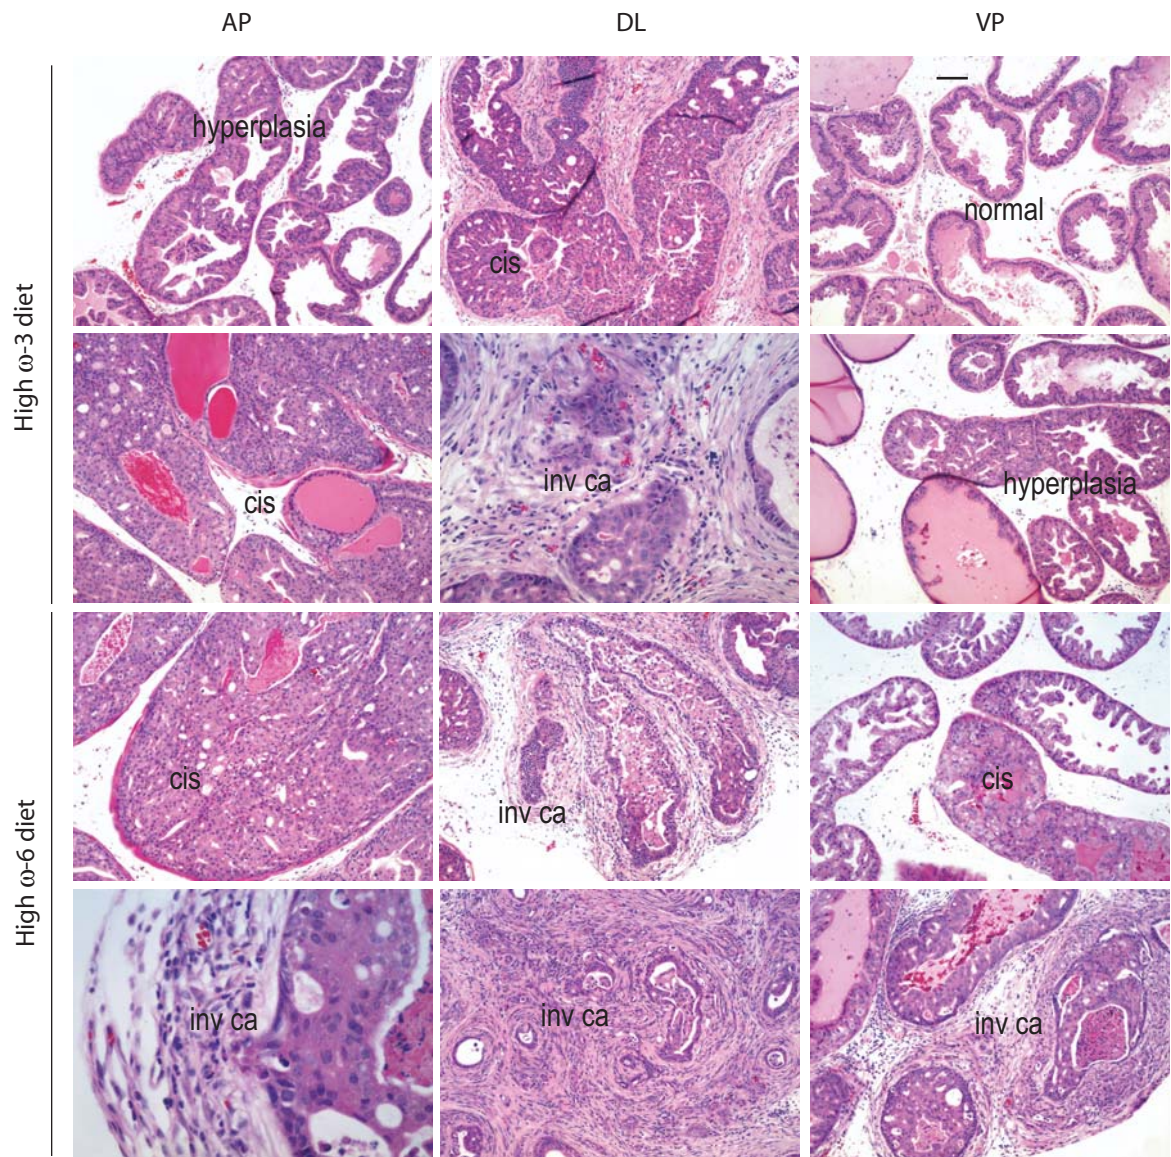

sFigure 4

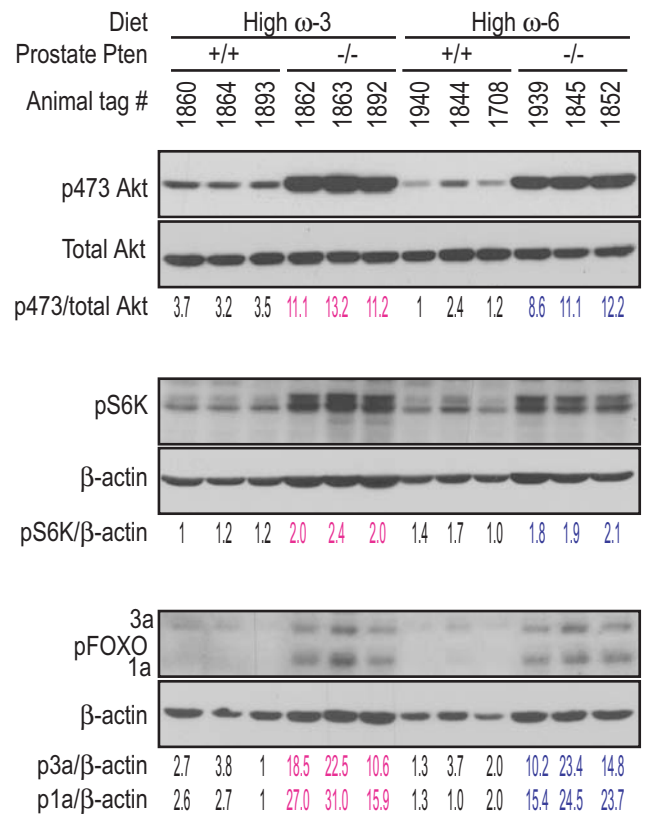

sFigure 5

## Supplemental figures

### sTable I. Diet Ingredients.

**sFig. 1. Omega-6 to 3 PUFA ratio in diets.** Omega-6:3 ratio in the high omega-3 diet is 1, which is recommended for human consumption by a panel nutritionists and found in some populations such Inuit. Omega-6:3 ratio is 20 in the low omega-3 diet and 40 in the high omega-6 diet, which are within the range of omega-6 to 3 ratios found in typical American diets.

### sFig. 2. Fatty acid distribution and incorporation of omega-3 and omega-6 PUFA in phospholipids.

**A.** Total fatty acids were measured in the food, blood and prostate tissues of *Pten*<sup>P+/+</sup>, *Pten*<sup>P+/-</sup> and *Pten*<sup>P-/-</sup> mice fed with the experimental diets. Percent distribution of total fatty acids in blood samples is shown (averaged from 5 mice per group). By convention, fatty acids are named after the number of carbon atoms and the number of double-bonds. As expected, mice fed with the three diets showed major differences in omega-6 PUFA [linoleic acid (18:2) and arachidonic acid (20:4)], as well as omega-3 PUFA [eicosapentaenoic acid (20:5) and docosahexaenoic acid (22:6)]. Omega-3 PUFA linolenic acid (18:3) was low in food and prostate tissues and not detectable in the blood.

**B.** Percent of omega-3 (LNA 18:3, EPA 20:5 and DHA 22:6 in pink text) and omega-6 (LA 18:2 and AA 20:4 in blue text) as well as the omega-6 to 3 ratios are shown for food, blood and prostate tissue of mice on each diet. Omega-6:omega-3 ratios in the blood and prostate reflected those of the corresponding diet.

**C.** Phosphatidylcholine profiles were determined in blood and prostate samples. Data is shown are percentages of the major PUFA-containing PC species in blood samples from animal on each diet. Ratios of omega-6 to omega-3 PUFA-containing PCs are indicated below each chart. PC species are identified by the fatty acids at the *sn-1* and *sn-2* positions (shown as *sn-1/sn-2*): 16:0/18:2, 1-palmitoyl-2-linoleoyl-

sn-glycero-3-phosphocholine; 16:0/20:4, 1-palmitoyl-2-arachonoyl-sn-glycero-3-phosphocholine; 18:0/20:4, 1-stearoyl-2-arachonoyl-sn-glycero-3-phosphocholine; 16:0/22:6, 1-palmitoyl-2-docosahexaenoic-sn-glycero-3-phosphocholine; 18:0/22:6, 1-stearoyl-2-docosahexaenoic-sn-glycero-3-phosphocholine. “Others” refers to PC species with saturated and monounsaturated fatty acids at the *sn*-2 position. A higher percentage of PC molecules contained omega-3 PUFA at the *sn*-2 position (22:6) in mice fed the high omega-3 diet compared to the other diets. PC molecules were enriched in omega-6 PUFA at the *sn*-2 position (18:2 and 20:4) in mice fed the high omega-6 diet. Omega-3 PUFA containing PC increased by a factor of 4.6 between the high and low omega-3 diets, and by a factor of 5.2 between the high omega-3 and high omega-6 diets. Phospholipid profiling of PE showed major differences in 18:0/**20:4**, 16:0/**22:6** and 16:0/**20:5** species, and omega-3 containing PE were also increased by a factor of 5.2 in the prostate of animals on the high omega-3 compared to the high omega-6 diet (data not shown). Major PS differences were in 18:0/**20:4**, 20:0/**20:4**, 16:0/**22:6** and 18:0/**22:6** species, with a 2.9-fold increase in omega-3-containing PS in animals on the high omega-3 compared to the high omega-6 diet (data not shown).

**sFig. 3. Fatty acid distribution and body weight gained over time.** **A:** percent of total fatty acids for 20:5, 22:6, 18:2 and 20:4 are shown for *Pten*<sup>P+/+</sup>, *Pten*<sup>P+/-</sup> and *Pten*<sup>P-/-</sup> mice fed with the high omega-6 diet. The levels of omega-3 and omega-6 PUFA remained constant regardless of genotype. Fatty acid distribution was similarly conserved among genotypes in the high omega-3 and low omega-3 diet. **B:** percent of total fatty acids for 20:5, 22:6, 18:2 and 20:4 are shown for mice fed the high omega-6 diet at 5, 8 and 12 weeks of age. The level of omega-3 and omega-6 PUFA remained constant regardless of age. **C:** Similar body weight gain over 5 to 12 weeks in mice fed the high omega-3, low omega-3 and high omega-6 diet.



**sFig. 4. Histology of *Pten*<sup>P-/-</sup> prostates.** Histology of prostates from 8 week-old mice fed the high omega-3, low omega-3 or high omega-6 diet. Cis: carcinoma *in situ*, inv ca: invasive carcinoma, AP: anterior prostate, DL: dorsolateral prostate, VP: ventral prostate. Bar, 100  $\mu$ m.

**sFig. 5. Phosphorylation of S6K and FOXO.** Prostate tissues were obtained from 8-week-old *Pten*<sup>P+/+</sup> and *Pten*<sup>P-/-</sup> mice fed the high omega-3 and high omega-6 diets. Protein lysates were used for Western blotting of Akt, Akt pS473, S6K pT389, Foxo and  $\beta$ -actin. Ratios are indicated at the bottom of corresponding panel.
